# Supplementary material for: Radiologic Identification of Pathologic Tumor Invasion in Patients With Lung Adenocarcinoma
Source: PubMed Central journal article supplement (PMC10580106; doi:10.1001/jamanetworkopen.2023.37889), 2023-10-16
Supplement: jamanetwopen-e2337889-s001.pdf [file jamanetwopen-e2337889-s001.pdf]

## Supplemental Online Content

Ye T, Wu H, Wang S, et al. Radiologic identification of pathologic tumor invasion in patients with lung adenocarcinoma. *JAMA Netw Open*. 2023;6(10):e2337889. doi:10.1001/jamanetworkopen.2023.37889

**eFigure 1.** Representative Images of Ground Glass Opacity Nodule Shown on Routine High Resolution Computed Tomography

**eFigure 2.** Representative Images of Radiologic Features

**eFigure 3.** The Sensitivity and Specificity for the Solid Component Sizes in Identifying Pathologic Invasive Adenocarcinoma for Part-Solid Nodules

**eFigure 4.** The Pathologic Characteristics of the Pathologic Invasive Adenocarcinomas in This Study

**eTable.** Cut-Off Values of Solid Component Size for Identifying Invasive Adenocarcinoma in Part-Solid Nodules

This supplemental material has been provided by the authors to give readers additional information about their work.

**eFigure 1. Representative Images of Ground Glass Opacity Nodule Shown on Routine High Resolution Computed Tomography**

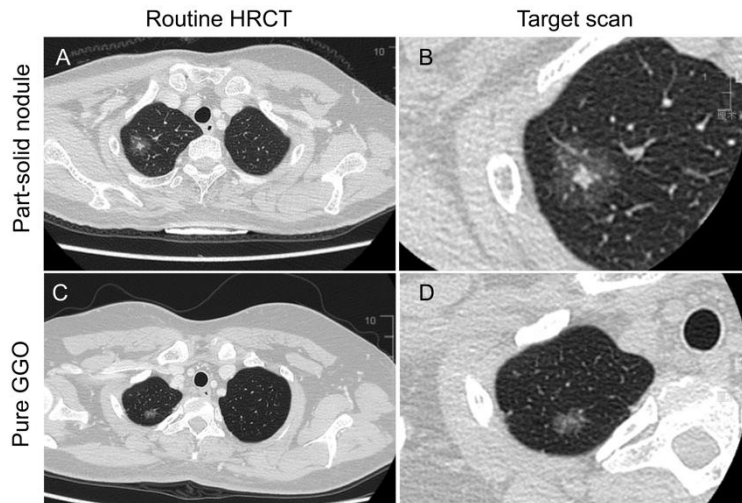

**eFigure 1.** Representative images of part-solid nodule and pure ground glass opacity (GGO) nodule shown on routine high resolution computed tomography (HRCT) scan and target scan.

## eFigure 2. Representative Images of Radiologic Features

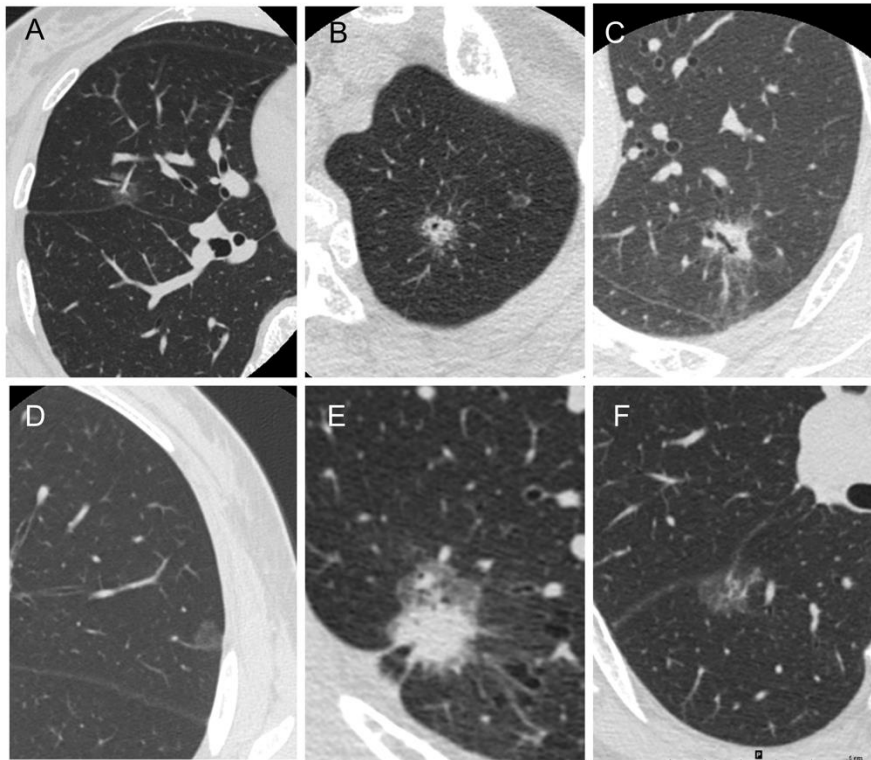

**eFigure 2.** Representative images of radiologic features. (A) A pure GGO nodule featured as presence of air bronchogram and pleural indentation. (B) A part-solid nodule featured as unclear tumor-lung interface, presence of bubble lucency and air bronchogram. (C) A part-solid nodule featured as unclear tumor-lung interface and presence of air bronchogram. (D) A pure GGO nodule featured as clear tumor-lung interface. (E) A part-solid nodule featured as lobulated and spiculated margin, presence of pleural indentation and air bronchogram. (F) A pure GGO nodule featured as lobulated margin, clear tumor-lung interface and presence of pleural indentation.

**eFigure 3. The Sensitivity and Specificity for the Solid Component Sizes in Identifying Pathologic Invasive Adenocarcinoma for Part-Solid Nodules**

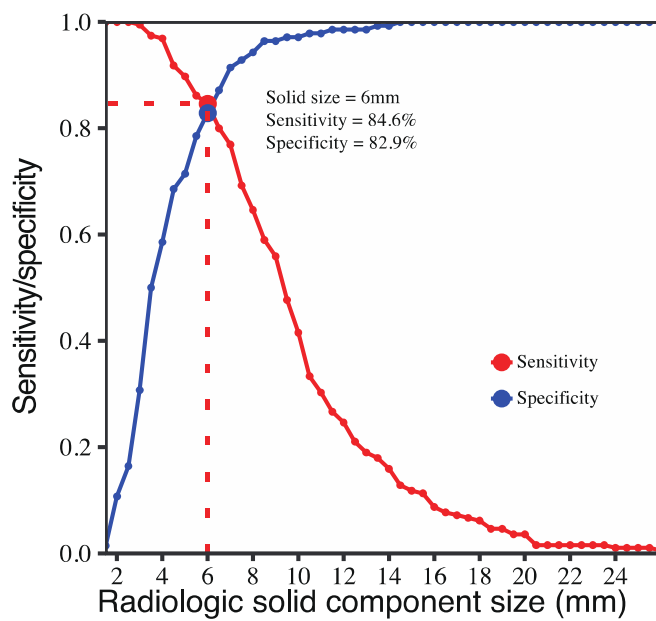

**eFigure 3.** The sensitivity and specificity for the solid component sizes in identifying pathologic invasive adenocarcinoma for part-solid nodules. A solid component size of 6mm was identified as the optimal cut-off value, with the sensitivity of 84.6% and the specificity of 82.9%.

**eFigure 4. The Pathologic Characteristics of the Pathologic Invasive Adenocarcinomas in This Study**

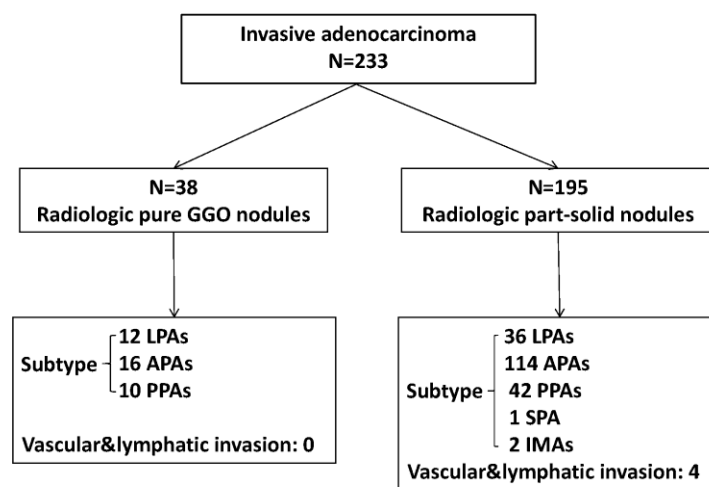

**eFigure 4.** The pathologic characteristics of the pathologic invasive adenocarcinomas in this study.

**eTable . Cut-off values of solid component size for identifying invasive adenocarcinoma in part-solid nodules.**

| Solid component size (mm) | All tumors   |              | Tumor size ≤10mm |               | 10mm < Tumor size ≤ 20mm |              | Tumor size > 20mm |              |
|---------------------------|--------------|--------------|------------------|---------------|--------------------------|--------------|-------------------|--------------|
|                           | Sensitivity  | Specificity  | Sensitivity      | Specificity   | Sensitivity              | Specificity  | Sensitivity       | Specificity  |
| 5                         | 89.7%        | 71.4%        | 100.0%           | 93.2%         | 87.7%                    | 55.3%        | 91.8%             | 60.0%        |
| 5.5                       | 86.2%        | 78.6%        | 87.5%            | 100.0%        | 84.2%                    | 63.2%        | 89.0%             | 60.0%        |
| <b>6</b>                  | <b>84.6%</b> | <b>82.9%</b> | <b>87.5%</b>     | <b>100.0%</b> | <b>82.5%</b>             | <b>69.7%</b> | <b>87.7%</b>      | <b>80.0%</b> |
| 6.5                       | 80.0%        | 87.1%        | 62.5%            | 100.0%        | 76.3%                    | 77.6%        | 87.7%             | 80.0%        |
| 7                         | 76.9%        | 91.4%        | 50.0%            | 100.0%        | 72.8%                    | 85.5%        | 86.3%             | 80.0%        |
