# Supplementary material for: Radiologic Identification of Pathologic Tumor Invasion in Patients With Lung Adenocarcinoma
Source: PubMed Central journal article supplement (PMC10580106; doi:10.1001/jamanetworkopen.2023.37889), 2023-10-16
Supplement: jamanetwopen-e2337889-s002.pdf [file jamanetwopen-e2337889-s002.pdf]

## Data Sharing Statement

Ye. Radiologic Identification of Pathologic Tumor Invasion in Patients With Lung Adenocarcinoma. *JAMA Netw Open*. Published October 16, 2023.  
doi:10.1001/jamanetworkopen.2023.37889

### Data

**Data available:** Yes

**Data types:** Participant data with identifiers

**How to access data:** Trial data relating to this publication could be disclosed to investigators who provide a written request, starting immediately and ending 3 years after publication. Data sharing requests should be directed to Dr. Haiquan Chen. Requests for data access and sharing for the trial should be emailed at [hqchen1@yahoo.com](mailto:hqchen1@yahoo.com).

**When available:** With publication

### Supporting Documents

**Document types:** None

### Additional Information

**Who can access the data:** Researchers whose proposed use of the data has been approved.

**Types of analyses:** Only for research purpose.

**Mechanisms of data availability:** Data sharing requests should be directed to Dr. Haiquan Chen. Requests for data access and sharing for the trial should be emailed at [hqchen1@yahoo.com](mailto:hqchen1@yahoo.com).
